# Supplementary material
Source: publisher site journal article supplement (https://www.spandidos-publications.com/4943/downloadSupplementary)
Supplement: Supplementary file 1 [file downloadSupplementary]

## Sheet: sheet1
	Table SIV. Combination models.
	Model		Parameters	Case numbers		AUC	Sensitivity	Specificity	PPV	NPV	Accuracy	First author (Ref.)a	Published year
				CNSL (PCNSL)	Non-CNSL (HGG)
	Multivariate logistic regression model		ADC, CXCL13 and IL-10 in CSF	43 (38)	44 (14)	0.928b	81%b	91%b	90%b	83%b	86%b	Mabray et al (94)	2016
			rADC and Ktrans	18 (18)	42 (42)	0.93	0.738	1	NA	NA	NA	Lu et al (22)	2017
			rADCmean and rSWI	31 (31)	57 (57)	0.936	1	0.871	NA	NA	NA	Ozturk et al (18)	2021
			ADC, rCBV_corr, kep, and ITSS	30 (30)	70 (70)	0.92	0.9	0.7	0.875	0.75	0.84	Saini et al (37)	2018
			Mean and maximum selective ADC, mean and maximum CBV, and rCBVmean	37 (37)	37 (37)	1	1	1	1	1	1	Eisenhut et al (93)	2020
			T/N_SUVmax and rTBFmax	20 (20)	55 (55)	0.991	0.95	0.964	NA	NA	NA	Hatakeyama et al (95)	2021
	2-step decision tree		ADCmin and rCBV	33 (33)	54 (54)	NA	NA	NA	NA	NA	NA	Makino et al (23)	2018
	aReferences are included in the manuscript. bValue of CNSL vs non-CNSL. ADC, apparent diffusion coefficient (x10-3mm2/sec); PCNSL, primary cranial nervous system lymphoma; HGG, high-grade glioma; rCBV, relative cerebral blood volume; Ktrans, permeability transfer constant (min-1); rSWI, relative susceptibility-weighted imaging; rCBV_corr, relative cerebral blood volume with leakage correction; ke…
